# Supplementary material for: Water and methylamine acetate synergistically induced the growth of three primary color luminous MAPbBrnX3−n@PbX(OH) microwires
Source: Royal Society of Chemistry journal article supplement (doi:10.1039/d4ce00449c), 2024-01-01
Supplement: d4ce00449c1.pdf [file d4ce00449c1.pdf]

## Supporting Information for:

### **Water and Methylamine Acetate Synergistic Induced the Growth of Three Primary Color Luminous MAPbBr<sub>n</sub>X<sub>3-n</sub>@PbX(OH) Microwires**

Chengwei Wang<sup>[a][b]</sup>, Rui Wang<sup>[a][b]</sup>, Yanan Liao<sup>[a]</sup>, Kai Liu<sup>[a]</sup>, Qingyi Zhang<sup>[a]</sup>, Lei Wang<sup>[a]</sup>, Dawei Gu<sup>[a]</sup>, Feifei Qin<sup>[c]</sup>, Feng Chen<sup>\*[a]</sup>

[a] School of Physical and Mathematical Sciences

Nanjing Tech University

Nanjing, 211816, China E-mail: fengchenzql@njtech.edu.cn

[b] College of Food Science and Light Industry

Nanjing Tech University

Nanjing, 211816, China

[c] College of Telecommunications and Information Engineering

Nanjing University of Posts and Telecommunications

Nanjing, 210003, China

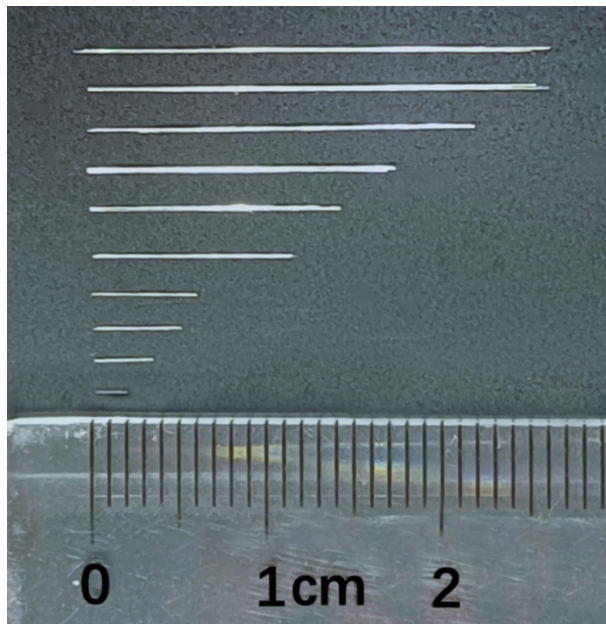

Figure S1. The photographs of the self-assembled PbBr<sub>2</sub> MWs with different lengths.

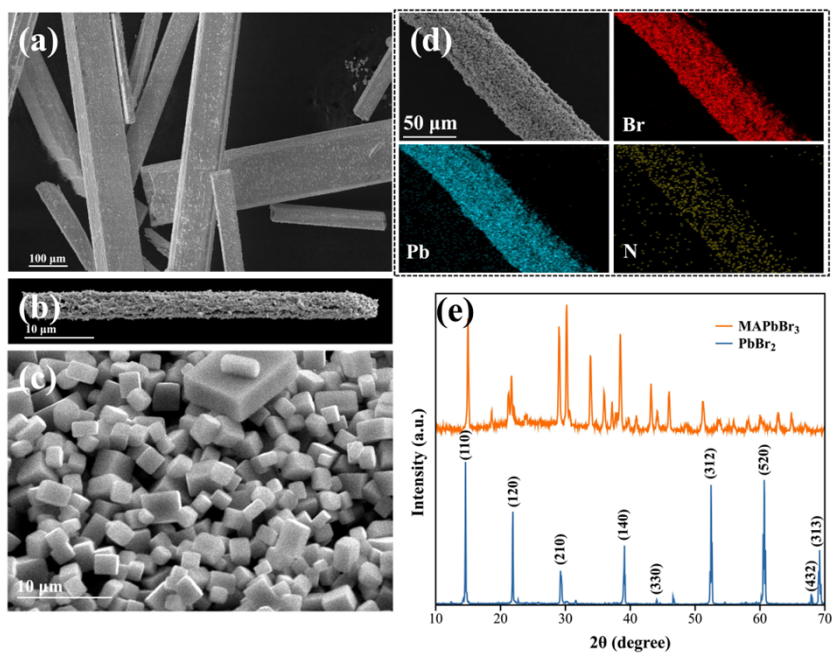

Figure S2. (a)-(d) FE-SEM images and the elemental mapping analysis of MAPbBr<sub>3</sub> MWs. (e) XRD patterns of PbBr(OH) MWs and MAPbBr<sub>3</sub> MWs.

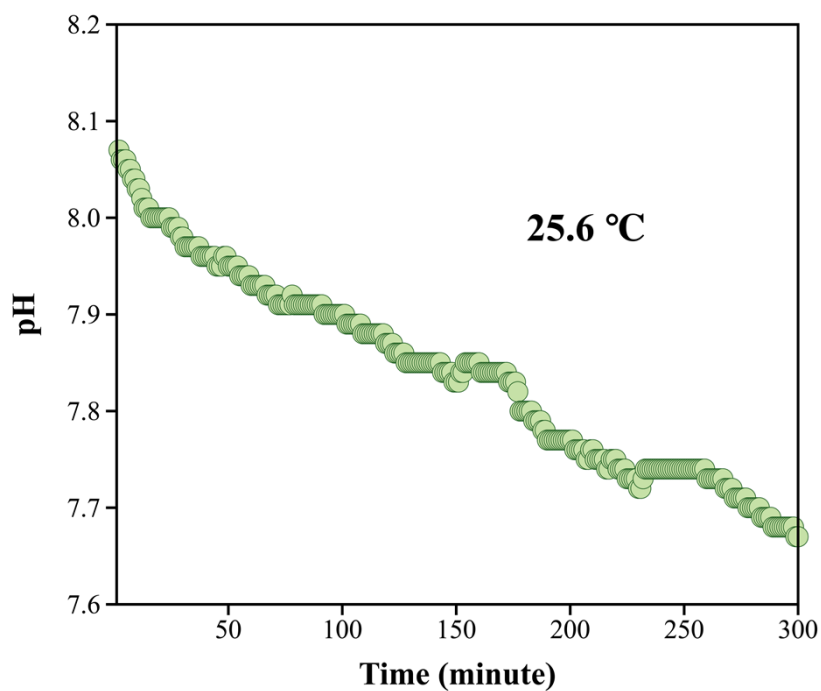

Figure S3. PH value changing curve of the complex solution at 25.6°C for 6 hours.

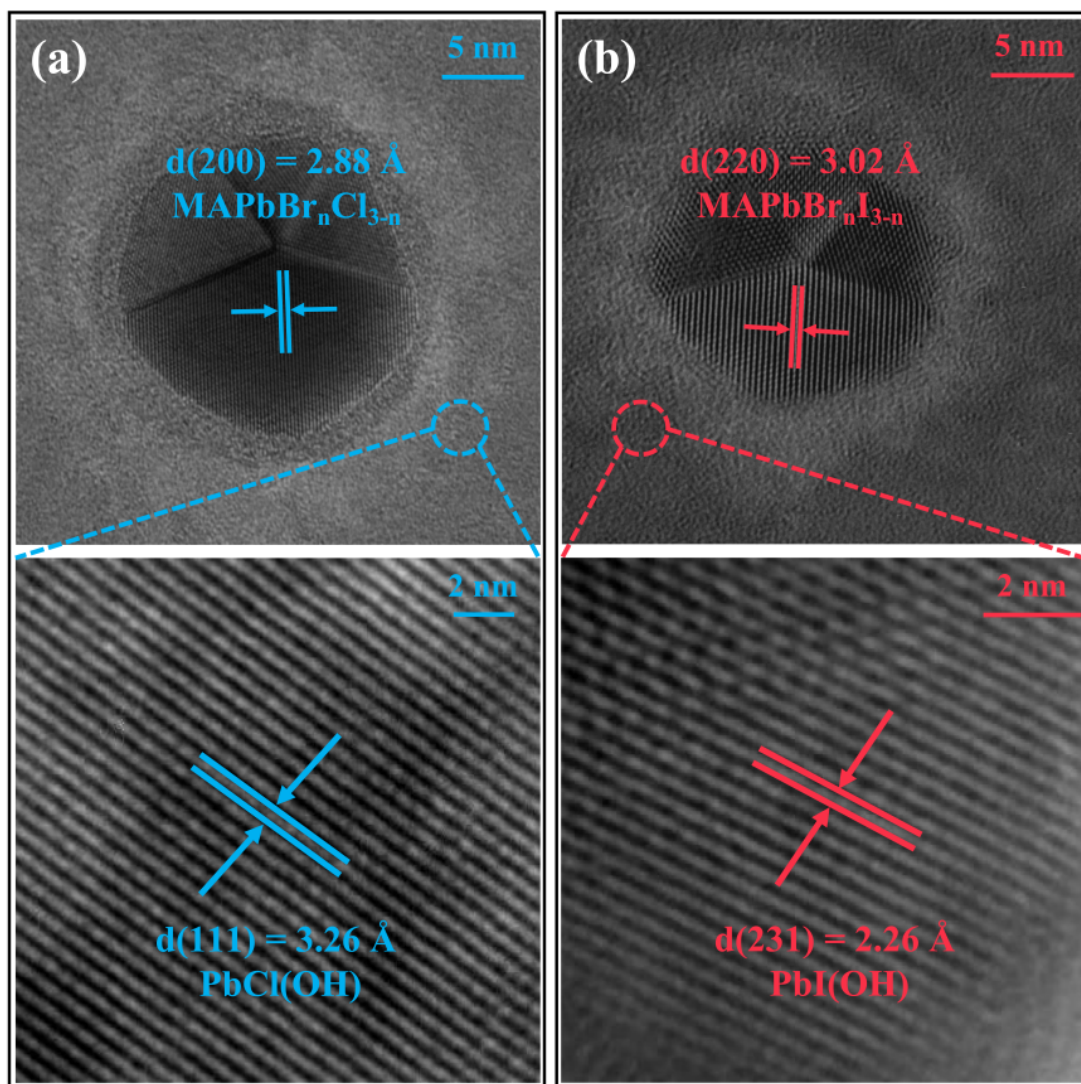

Figure S4. HR-TEM images of  $\text{MAPbBr}_n\text{Cl}_{3-n}@\text{PbCl}(\text{OH})$  and  $\text{MAPbBr}_n\text{I}_{3-n}@\text{PbI}(\text{OH})$  MWs.

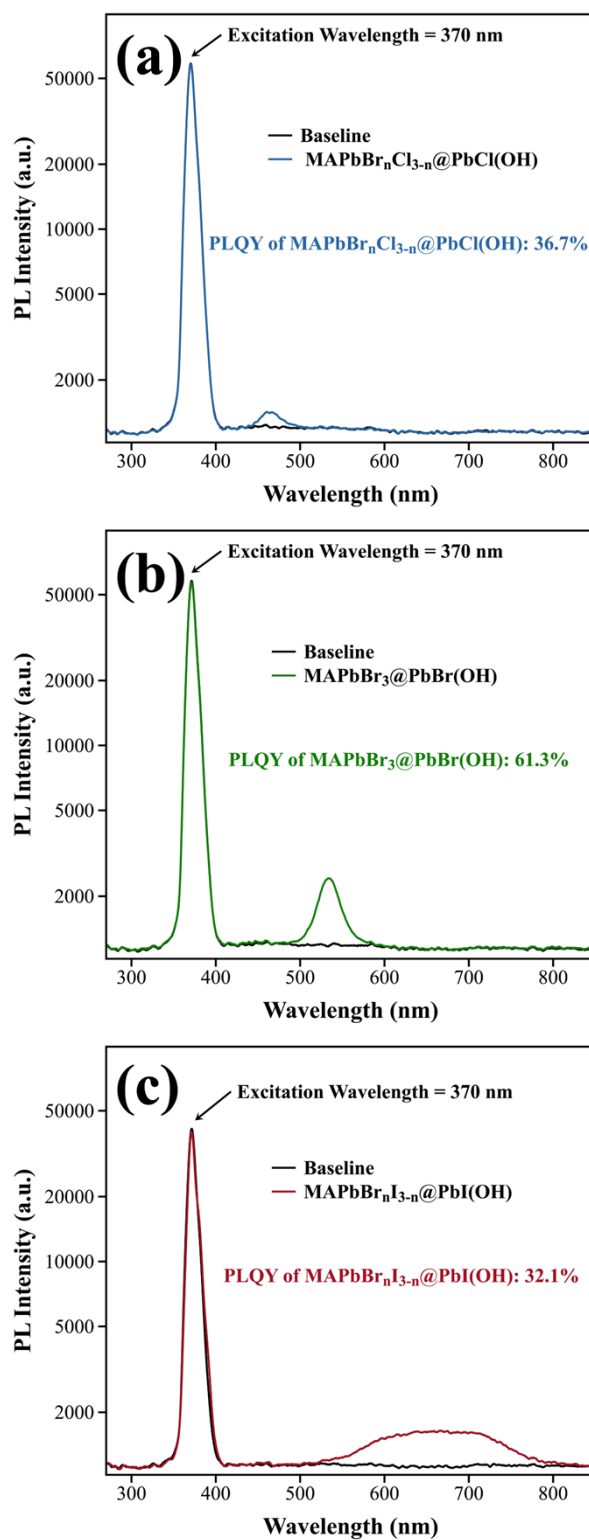

Figure S5. Photoluminescence quantum yield (PLQY) of the three primary color luminous  $\text{MAPbBr}_n\text{X}_{3-n}\text{@PbX(OH)}$  microwires.

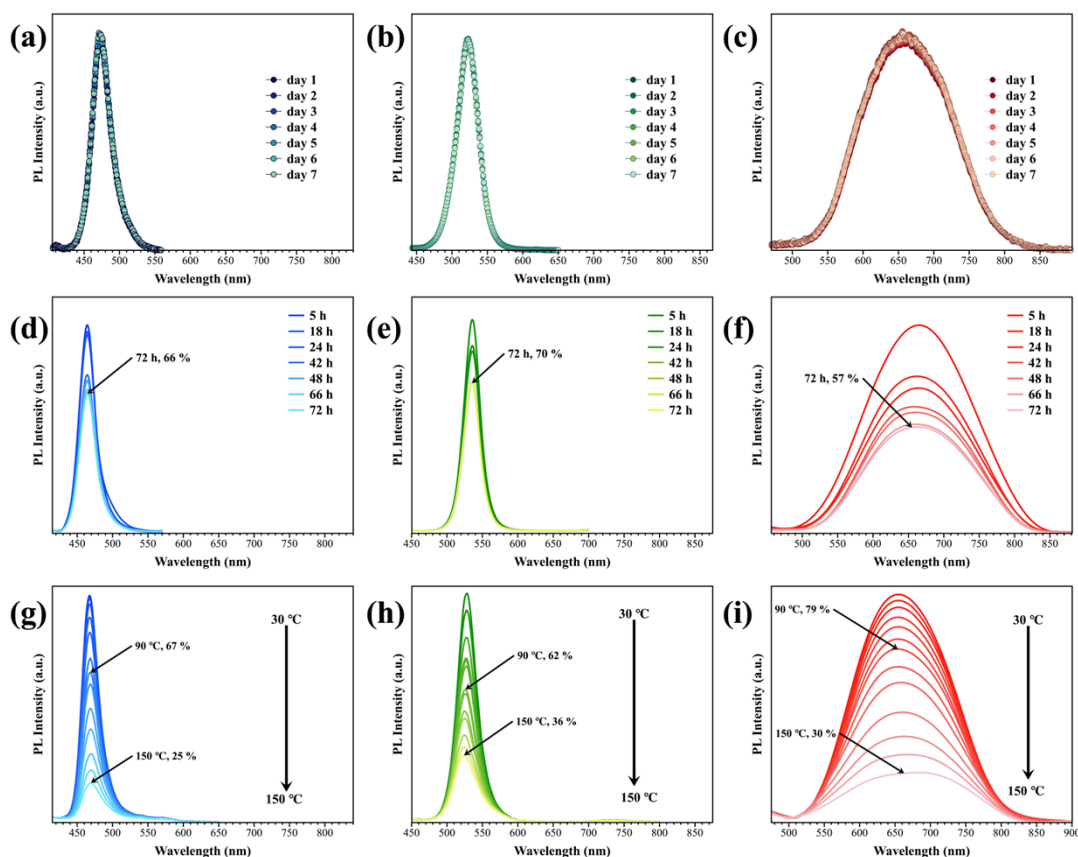

Figure S6. PL spectra of the three primary color luminous microwires during harsh environmental stability test: (a-c) The polar solvent stability study of these three primary color luminous microwires in a mixture of seven polar solvents: H<sub>2</sub>O, EtOH, MeOH, DMF, DCM, DMSO, and Acetone for 7 days. (d-e) The stability study of these three primary color luminous microwires upon continuously irradiation with a 365 nm UV lamp (light intensity = 0.27 mW/cm<sup>2</sup>). (g-i) The stability study of these three primary color luminous microwires under heating at different temperatures.
